# Supplementary material
Source: HighWire-hosted journal article supplement (https://gut.bmj.com/highwire/filestream/193032/field_highwire_adjunct_files/3/Tsilingiri_et._al._Sup._Fig._3.pdf)
Supplement: Tsilingiri_et._al._Sup._Fig._3.pdf [file Tsilingiri_et._al._Sup._Fig._3.pdf]

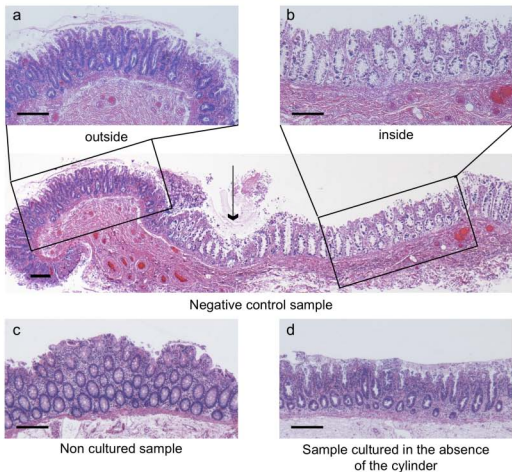

Suppl. Fig. 3: Overnight incubation with medium within the cylinder leads to tissue degeneration secondary to asphyxiation a-b. The tissue was cultured for 24 h in the presence of the cylinder as well as 200 $\mu$ L of medium in the interior part of the cylinder.  
 a. inset, magnification of the corresponding area of the tissue outside the cylinder,  
 b. inset, magnification of the corresponding area of the tissue inside the cylinder; arrow in middle panel: cylinder contact point,  
 c. tissue upon arrival,  
 d. tissue cultured in the absence of the cylinder. All scale bars are 500 $\mu$ m.
